# Supplementary material for: A Screen for rfaH Suppressors Reveals a Key Role for a Connector Region of Termination Factor Rho
Source: PubMed Central journal article supplement (PMC5449661; doi:10.1128/mbio.00753-17), 2017-05-30
Supplement: mbo003173329sf1.pdf [file mbo003173329sf1.pdf]

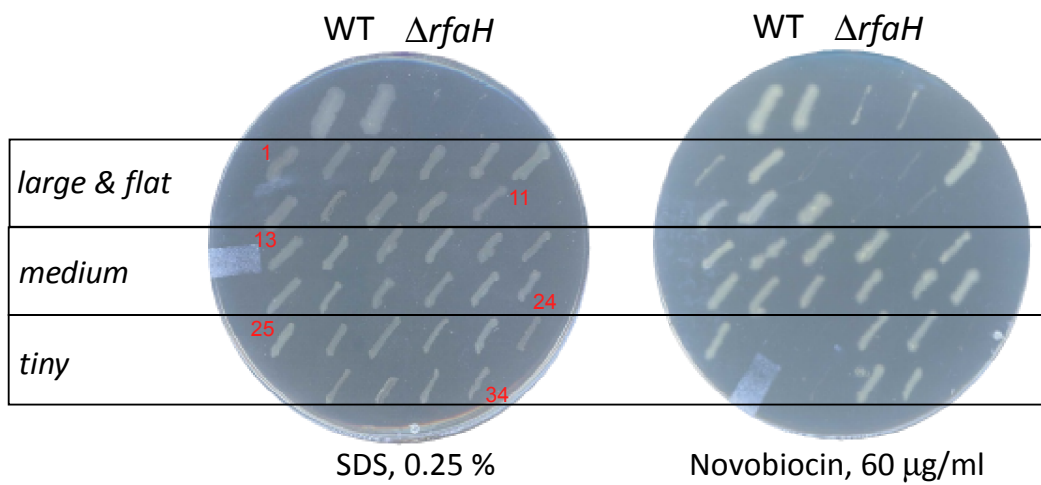

Novobiocin-sensitive variants

- |             |                                        |
|-------------|----------------------------------------|
| 1           | <i>rho</i> $\Delta$ 156-158            |
| 3, 4, 5, 10 | <i>rho</i> I382S                       |
| 17          | <i>rho</i> G150D                       |
| 26          | <i>rho</i> S325P                       |
| 27          | <i>rho</i> L285F                       |
| 31, 32      | <i>rhoL</i> - $\Omega$ IS2- <i>rho</i> |
| 11          | <i>hns</i> $\Delta$ 25-28              |
