# Supplementary material for: A Screen for rfaH Suppressors Reveals a Key Role for a Connector Region of Termination Factor Rho
Source: PubMed Central journal article supplement (PMC5449661; doi:10.1128/mbio.00753-17), 2017-05-30

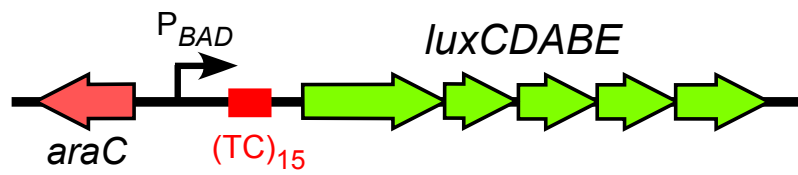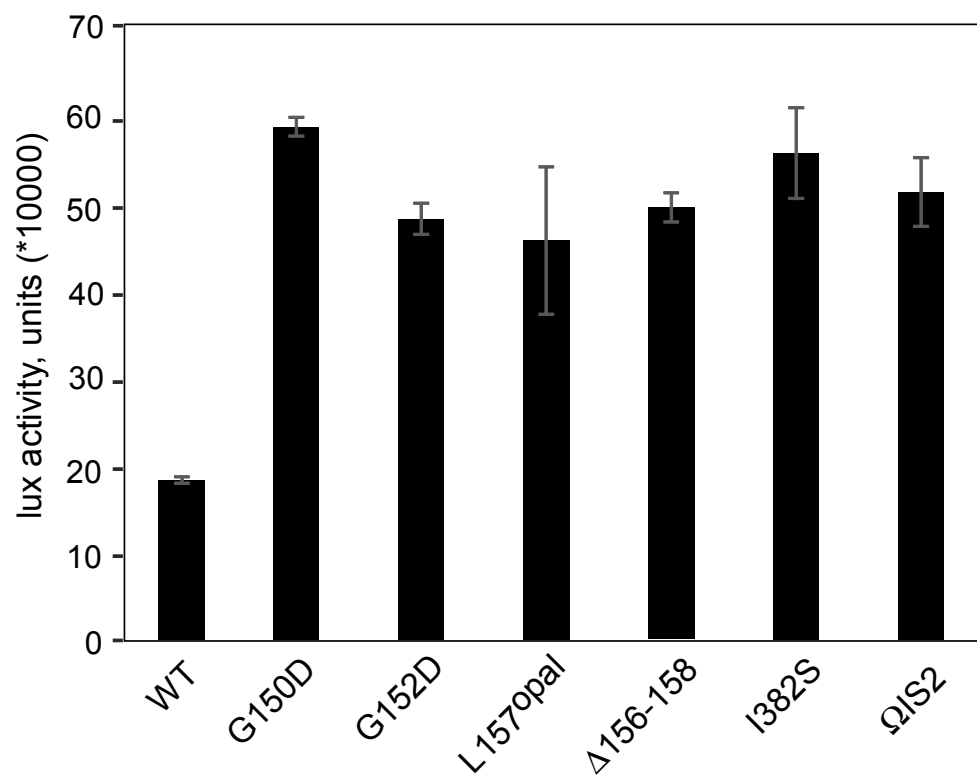

Supplement: mbo003173329sf5.pdf [file mbo003173329sf5.pdf]
